# Supplementary material for: The Impact of Blenderized Tube Feeding on Gastrointestinal Symptoms, a Scoping Review
Source: MDPI journal article supplement (doi:10.3390/app13042173), 2023-02-08
Supplement: s1 [file s1]

Archive with 2 entries (2 files):
- Supplementary Table S1. Methodology of search for articles evaluated in this Review.pdf
- supplementary Table S2. PRISMA-ScR-Fillable-Checklist_10Sept2019.pdf
