# Supplementary material for: The Impact of Blenderized Tube Feeding on Gastrointestinal Symptoms, a Scoping Review
Source: MDPI journal article supplement (doi:10.3390/app13042173), 2023-02-08
Supplement: s1 [file s1 › Supplementary Table S1. Methodology of search for articles evaluated in this Review.pdf]

**Supplementary Table S1.** Methodology of search for articles evaluated in this Review

| Database                | Search strategy                                                                                                                                                                                                                                                                                                                                                                                                                                                                                                                                                                                                                                                                    |
|-------------------------|------------------------------------------------------------------------------------------------------------------------------------------------------------------------------------------------------------------------------------------------------------------------------------------------------------------------------------------------------------------------------------------------------------------------------------------------------------------------------------------------------------------------------------------------------------------------------------------------------------------------------------------------------------------------------------|
| <b>PubMed</b>           | <ol style="list-style-type: none"> <li>1. (((((((blenderized feeding[Title/Abstract]) OR (blenderised feeding[Title/Abstract])) OR (real food[Title/Abstract])) OR (natural food[Title/Abstract])) OR (homemade enteral preparations[Title/Abstract])) OR (fresh foods[Title/Abstract]))</li> <li>2. (((((enteral nutrition[Title/Abstract]) OR (nutritional support[Title/Abstract])) OR (tube feeding[Title/Abstract])) OR (gastrostomy[Title/Abstract])) OR (artificial feeding[Title/Abstract]))</li> <li>3. (1) AND (2)</li> <li>4. (3) AND Humans AND English.</li> </ol>                                                                                                    |
| <b>Scopus</b>           | <ol style="list-style-type: none"> <li>1. (TITLE-ABS-KEY (blenderized feeding) OR TITLE-ABS-KEY (blenderised feeding) OR TITLE-ABS-KEY (real food) OR TITLE-ABS-KEY (natural food) OR TITLE-ABS-KEY (homemade enteral preparations) OR TITLE-ABS-KEY (fresh foods)</li> <li>2. (TITLE-ABS-KEY (enteral nutrition) OR TITLE-ABS-KEY (nutritional support) OR TITLE-ABS-KEY (tube feeding) OR TITLE-ABS-KEY (gastrostomy) OR TITLE-ABS-KEY (artificial feeding)</li> <li>3. (1) AND (2)</li> <li>4. (3) LIMIT-TO (LANGUAGE, "English") AND LIMIT-TO (PUBSTAGE , "final") AND LIMIT-TO (SUBJAREA , "MEDI" ) OR LIMIT-TO (SUBJAREA, "BIOC") OR LIMIT-TO (SUBJAREA , "NURS")</li> </ol> |
| <b>Cochrane Library</b> | <ol style="list-style-type: none"> <li>1. (blenderized feeding):ti,ab,kw OR (real food):ti,ab,kw OR (natural food):ti,ab,kw OR (homemade enteral preparations):ti,ab,kw OR (fresh food):ti,ab,kw</li> <li>2. ("enteral nutritional support"):ti,ab,kw OR ("nutritional support"):ti,ab,kw OR ("tube feeding"):ti,ab,kw OR ("gastrostomy"):ti,ab,kw OR (artificial feeding):ti,ab,kw</li> <li>4. (1) AND (2)</li> </ol>                                                                                                                                                                                                                                                             |
